# Supplementary material for: PdFe alloy nanoparticles supported on nitrogen-doped carbon nanotubes for electrocatalytic upcycling of poly(ethylene terephthalate) plastics into formate coupled with hydrogen evolution
Source: Royal Society of Chemistry journal article supplement (doi:10.1039/d3ta07827b), 2024-01-01
Supplement: d3ta07827b1.pdf [file d3ta07827b1.pdf]

**PdFe alloy nanoparticles supported on nitrogen-doped carbon nanotubes for electrocatalytic upcycling of poly(ethylene terephthalate) plastics into formate coupled with hydrogen evolution**

Heng Zhang,<sup>a,b</sup> Zhenzhen Liu,<sup>a,b</sup> Huaimeng Li,<sup>a</sup> Zhen Fu,<sup>a</sup> Guofeng Zhang,<sup>a</sup> Haimin Zhang,<sup>a,b</sup>

Guozhong Wang,<sup>a,b</sup> and Yunxia Zhang<sup>\*,a,b</sup>

<sup>a</sup> *Key Laboratory of Materials Physics, Centre for Environmental and Energy Nanomaterials, Anhui*

*Key Laboratory of Nanomaterials and Nanotechnology, Institute of Solid State Physics, Hefei*

*Institutes of Physical Science, Chinese Academy of Sciences, Hefei 230031, China.*

<sup>b</sup> *University of Science and Technology of China, Hefei 230026, P. R. China*

---

\* Correspondence Author. Email: [yxzhang@issp.ac.cn](mailto:yxzhang@issp.ac.cn)  
Fax: +86-551-65591434; Tel: +86-551-65592145

## **S1. Experimental section**

### **S1.1. Chemicals and materials**

Carbon nanotubes (CNTs, diameter = 60–100 nm) were purchased from Shenzhen Nanotech Port Co., Ltd (China). Ferric acetylacetonate ( $\text{Fe}(\text{acac})_2$ ) and NaI were obtained from Alfa Aesar. The commercial Pt/C (20 wt%) and  $\text{RuO}_2$  was obtained from Johnson Matthey. Polyvinyl pyrrolidone (PVP), N, N-dimethylformamide (DMF), and KOH were all used as received if not mentioned. Carbon cloth (CC) was obtained from Hongshan District, Wuhan Instrument Surgical Instruments (China). Before using, CC was pretreated with a  $\text{HNO}_3$  aq. solution, and then sonicated in acetone,  $\text{H}_2\text{O}$  and  $\text{CH}_3\text{CH}_2\text{OH}$  for 30 min, respectively.

### **S1.2. Material characterizations**

The phase and crystalline structure of as-prepared samples were identified by X-ray diffraction (XRD, X'Pert Pro Super, Philips Co., The Netherlands) with  $\text{Cu K}\alpha$  radiation (1.5478 Å). The morphology characterization of catalysts was collected on scanning electron microscopy (FE-SEM, SU8020, Hitachi) and a high-resolution transmission electron microscope (HRTEM, JEM-2010, JEOL, Japan). X-Ray photoelectron spectroscopy (XPS) measurements were performed on Thermo Scientific ESCALAB 250, while all of the binding energies were calibrated using C1s peak (284.8 eV). Fourier transform infrared (FT-IR) spectra were recorded on Thermo Nicolet NEXUS FT-IR spectrophotometer at room temperature. The content of metal elements in the catalysts was measured using an inductively coupled plasma atomic emission spectrometer (ICP-AES, ICP-6300, Thermo Fisher Scientific). The  $\text{H}_2$  content was determined by online gas chromatography (GC9790Plus, FULI INSTRUMENTS) thermal conductivity detector (TCD).

### **S1.3. Electrochemical measurements**

Unless otherwise specified, all electrochemical measurements were conducted at room temperature using CHI 660E electrochemical analyzer (CHI Instruments, Shanghai, China) in a conventional three-electrode system. A platinum wire was used as a counter electrode for EGOR and a graphite rod for HER. The reference electrode for all measurements was Hg/HgO. The catalyst supported the carbon cloth was directly used as the working electrode with a geometric area of 0.25 cm<sup>2</sup>. The inks were obtained by sonicating the mixture containing catalysts, i.e. 5 mg of catalyst, 475 μL of ethanol, 475 μL of water, and 50 μL of 5 wt% Nafion for 30 min. The ink mixture was coated on the CC surface with a loading of 1 mg/cm<sup>2</sup>. The 1 M KOH aqueous solution was used as the electrolytes, and all the polarization curves were recorded at a scan rate of 5 mV/s unless specifically indicated.

Electrochemical impedance spectroscopy (EIS) tests were carried out at a frequency ranging from 0.1 Hz to 100 kHz with AC amplitude of 10 mV. Furthermore, the potentials were converted to RHE scale according to the equation:  $E(\text{vs. RHE}) = E(\text{vs. Hg/HgO}) + 0.059 \cdot \text{pH} + 0.098 \text{ V}$ , where the pH value of 14 for 1.0 M KOH.

### **S1.4. Product analysis**

To determine the products of EG oxidation and calculate Faradaic efficiencies, the long-term bulk electrolysis was carried out in a three-electrode system at the constant potential of 1.35 V (vs. RHE) in 10 mL 1.0 M KOH with 0.3 M ethylene glycol under vigorous stirring at room temperature. The electrolyte solutions were collected after approximately 2 h electrolysis and then analyzed by nuclear magnetic resonance (NMR) spectrometer. <sup>1</sup>H NMR spectra were recorded on an AVANCE 400 (Bruker), in which 500 μL electrolyte was added with 50 μL D<sub>2</sub>O and 30 L dimethyl sulfoxide

(DMSO) used as an internal standard. The quantity of products in the samples was calculated by Eq.

(1)

$$m_{product} = \frac{I_{product} \times N_{DMSO} \times M_{product}}{I_{DMSO} \times N_{product} \times M_{DMSO}} \times m_{DMSO} \times n \quad (1)$$

where  $I_{product}$  is the integral of product peak;  $N_{product}$  is the numbers of proton or carbon corresponding to product peak;  $M_{product}$  is the molar mass of product;  $m_{DMSO}$  is the mass of DMSO;  $n = 50 \text{ mL}/500 \text{ }\mu\text{L} = 100$ .

The selectivity (%) and yield (%) of formate can be determined by the following Eq. (2) and (3), respectively.

$$Selectivity(\%) = \frac{N(\text{formate yield})}{2N(\text{consumed EG})} \times 100\% \quad (2)$$

$$Yield = \frac{N(\text{formate yield})}{2N(\text{initial EG})} \times 100\% \quad (3)$$

The Faraday efficiency (%) of the product formation can be determined by the following Eq. (4)

$$FE(\%) = \frac{N(\text{formate yield})}{\text{total charge passed}/3 \times 96485} \times 100\% \quad (4)$$

The Faradaic efficiency (FE) of HER catalysts is defined as the ratio of the amount of experimentally determined  $H_2$  ( $n_e$ ) to that of the theoretically expected  $H_2$  ( $n_t$ ) based on the reported method <sup>1</sup>:

$$FE = \frac{n_e}{n_t} \quad (5)$$

Theoretical amount of  $H_2$  was calculated by applying Faraday Law:

$$n_t = \frac{JAt}{2F} \quad (6)$$

Where J is current density, A is electrode area, t is time in second, 2 is number of electron, and F is faraday constant (96,485 C/mol). The Faradaic efficiency is conducted under galvanostatic

electrolysis at a current density of  $-20 \text{ mA/cm}^2$  over a period of 50 min. Furthermore, the evolved  $\text{H}_2$  was quantified by online gas chromatography using the water drainage method. The experimentally determined volume of  $\text{H}_2$  was very close to that of the theoretical value.

### **S1.5. PET and real-world plastic bottle pretreatment**

2 g of PET was pretreated in a 50 mL solution of 10 M KOH at  $60 \text{ }^\circ\text{C}$  for 8h, and the resulting suspension was used for electroreforming in the PdFe/N-CNTs//PdFe/N-CNTs pair-electrolysis system.

### **S1.6. Terephthalic acid (TPA) separation**

After electrolysis of PET hydrolysate, sulfuric acid was used to adjust the PH to  $< 3$  as an acidifier for TPA precipitation and regeneration through filtration. The resulting liquid stream was then concentrated and crystallized to solid  $\text{K}_2\text{SO}_4$ .

### **S1.7. ECSA calculation**

Electrochemical capacitance measurements were used to determine the active surface area of each catalyst. To estimate the electrochemical active surface area of the electrocatalysts, double-layer capacitance ( $C_{dl}$ ) was considered in the non-faradaic region ( $-0.654 \sim -0.714 \text{ V vs. RHE}$ ) of CVs recorded at different scan rates of 10, 20, 30, 40, 50 and 60 mV/s. Then, plotting the double-layer charging current at  $-0.684 \text{ V vs. scan rate}$  yielded a linear slope. Finally, the ECSA was obtained by dividing  $C_{dl}$  by the specific capacitance of the electrode material. Generally, the specific capacitance for flat surface electrodes was  $0.06 \text{ mF/cm}^2$ .

### **S1.8. Turnover frequency calculations**

To calculate the per-site turnover frequency (TOF), we used the following formula according to

previous reports<sup>1</sup>.

$$TOF \text{ per site} = \frac{\# \text{ Total Hydrogen Turn Overs/cm}^2 \text{ geometric area}}{\# \text{ Surface Sites /cm}^2 \text{ geometric area}}$$

The number of total hydrogen turn overs is calculated from the current density using the following equation:

$$\#_{H_2} = \left( j \frac{mA}{cm^2} \right) \left( \frac{1 C s^{-1}}{1000 mA} \right) \left( \frac{1 mol e^-}{96485.3 C} \right) \left( \frac{1 mol H_2}{2 mol e^-} \right) \left( \frac{6.022 \times 10^{23} H_2 \text{ molecules}}{1 mol H_2} \right) = 3.12 \times 10^{15} \frac{H_2/s}{cm^2} \text{ per } \frac{mA}{cm^2}$$

The total number of effective surface sites was calculated based on the following equation:

$$\frac{\# \text{ Surface sites}}{cm^2 \text{ geometric area}} = \frac{\# \text{ Surface sites (flat standard)}}{cm^2 \text{ geometric area}} \times \text{Roughness factor}$$

Here the roughness factor (Rf) can be determined by the double-layer capacitance ( $C_{dl}$ ). The surface sites of  $2 \times 10^{15}$  for the flat standard electrode was used for our calculation according to previous results<sup>2</sup>. Thus, the number of surface active sites for the PdFe/N-CNTs catalyst is estimated to be  $5.43 \times 10^{18}$  surface sites/cm<sup>2</sup>. Therefore, in 1 M KOH solution, the TOF per site for the PdFe/N-

CNTs catalyst at  $j_{100}$  is calculated as follows:  $0.046 \frac{H_2/s}{\text{surface site}}$

### S1.9. Mass Activity

The mass activity of the composite was calculated according to the following formula:

$$\text{Mass Activity (MA)} = \text{Catalytic Activity (CA)} / \text{Mass of Catalyst (MC)}$$

where catalytic activity is the rate of the target reaction (e.g., current density, reaction rate)

### S1.10. Theoretical calculation

In order to simulate the loading of nanoscale PdFe particles on the surface of CNTs, a 6-atom nanocluster ( $Pd_xFe_{6-x}$ ) was chosen. On the basis of the Woolf structure, the face-centered cubic palladium metal was more inclined to the cubic octahedral geometric structure, and  $Pd_6$  was the smallest of the octahedral “magic numbers”.<sup>3,4</sup> Since the size of the CNT in the experiment was

larger than that of PdFe nanoparticles, some studies have shown that the curvature of the CNT carrier has little effect. Therefore, the CNT carrier is approximated as a graphene sheet to reduce the complexity of the model. The model added a 15 Å vacuum layer along the Z axis to eliminate the interaction between the upper and lower surfaces. The model used a Monkhorst K-point grid with a  $3 \times 3 \times 1$  grid. All geometric optimizations were performed using the conjugate gradient algorithm implemented in CASTEP. The projector augmented wave (PAW) method was employed to treat the core electrons, and the generalized gradient approximation (GGA) of Perdew-Burke-Ernzerhof (PBE) to describe the exchange-correlation energy.<sup>5,6</sup> The Kohn-Sham wave functions were expanded with a cutoff energy of 400 eV. The calculated binding energy ( $E_{\text{ads}}$ ) was evaluated based on the following equation:

$$\Delta G_{\text{ads}} = E_{\text{sur+adsorbate}} - E_{\text{sur}} - E_{\text{adsorbate}}$$

where  $E_{\text{sur+adsorbate}}$ ,  $E_{\text{sur}}$ , and  $E_{\text{adsorbate}}$  are the obtained energies for the slab system containing the adsorbate, the energy of the slab, and the energy of the adsorbate in a vacuum, respectively. Here, ‘adsorbate’ refers to chemisorbed ethylene glycol or H<sub>2</sub>O species.

1. L. Yu, I.K. Mishra, Y. Xie, H. Zhou, J. Sun, J. Zhou, Y. Ni, D. Luo, F. Yu, Y. Yu, S. Chen, Z. Ren, *Nano Energy*, 2018, **53**, 492-500.
2. J. Kibsgaard, C. Tsai, K. Chan, J.D. Benck, J.K. Nørskov, F. Abild-Pedersen, T.F. Jaramillo, *Energy Environ. Sci.*, 2015, **8**, 3022-3029.
3. D. Chen, Z. Pu, R. Luo, P. Ji, P. Wang, J. Zhu, C. Lin, H.-W. Li, X. Zhou, Z. Hu, F. Xia, J. Wu and S. Mu, *Adv. Energy Mater.*, 2020, **10**, 2000814.
4. V. N. Popov, *New J. Phys.* 2004, **6**, 17.

5. W. Miehe, O. Kandler, T. Leisner and O. Eicht., *J. Chem. Phys.*, 1989, **91**, 5940-5952.

6. J. P. Perdew, K. Burke and M. Ernzerhof, *Phys. Rev. Lett.* 1996, **77**, 3865.

### **S3. Techno-economic analysis**

#### **S3.1. Costs:**

##### **S3.1.1. Material costs**

Material costs: 1 ton PET (500 \$/t), 1.4 ton KOH (850 \$/t), 2 ton water (0.22 \$/t), 1.2 ton H<sub>2</sub>SO<sub>4</sub> (148 \$/t)

*Material cost* = 1868 \$

##### **S3.1.2. Electricity costs:**

The total charge required for electro-reforming per ton of PET can be calculated as follows:

$$Q = \frac{\text{mass of ethylene glycol (g)} \times F \times N}{\text{Molar mass of ethylene glycol (g/mol)} \times FE}$$

Where Q is the total charge, n is the mole of EG (1 ton of PET), F is the Faraday's constant (96485) and N is the number of electron transfer (6), FE (85%) is the faradaic efficiency of formate production from PET electro-reforming.

The power required to maintain electrolysis process can be calculated as follows, assuming that the cell potential is 1.45 V, f is the capacity factor (0.8).

$$P = \frac{U \times Q}{3600 f}$$

$$\text{Electricity cost} = P \times \text{Price}$$

##### **S2.1.3. Separation costs:**

The separation costs are 50 % of electricity costs. Therefore, the electricity cost can be calculated as:



Electricity costs = Electrolyser electricity cost + Hydrolysis and Separation electricity

The price of electricity is assumed to be 0.07 \$/kWh.

#### **S3.1.4. Miscellaneous costs:**

In the PET plastic electrocatalytic upcycling process, miscellaneous costs including capital costs, installation costs, operating costs, and maintenance costs are 1165 \$/ton PET according to the reference.

#### **S3.2. Output products:**

The products of this process include terephthalic acid (TPA), formic acid (FA) and K<sub>2</sub>SO<sub>4</sub>. Per ton of PET as raw material can obtain 906 kg TPA (951 \$/ton), 436 kg FA (1479 \$/ton), 2215 kg K<sub>2</sub>SO<sub>4</sub> (887 \$/ton), and 0.0359 ton H<sub>2</sub> (1900 \$/ton). Therefore, the product value can be calculated as:

Total output product values = Cost of TPA × Mass of PET obtained + Cost of FA × Mass of FA obtained + Cost of K<sub>2</sub>SO<sub>4</sub> × Mass of K<sub>2</sub>SO<sub>4</sub> obtained Cathode HER to produce formic acid, which has a 99.3 % faradaic efficiency.

$$\text{Mass of } H_2 \text{ from HER at cathode} = \frac{Q \times \text{Molar mass of } H_2}{NF}$$

Where N takes the value 2 since H<sub>2</sub>O reduced to H<sub>2</sub> is a two-electron transfer process.

#### **S3.3. Potential profit:**

Therefore, the total income of electrolysis per ton of PET can be calculated as follows: Total profit per ton of PET = Product value per ton of PET - Total costs per ton of PET. Total profit = Product value - total cost = 3539.4 - 3127.5 = 411.9 \$

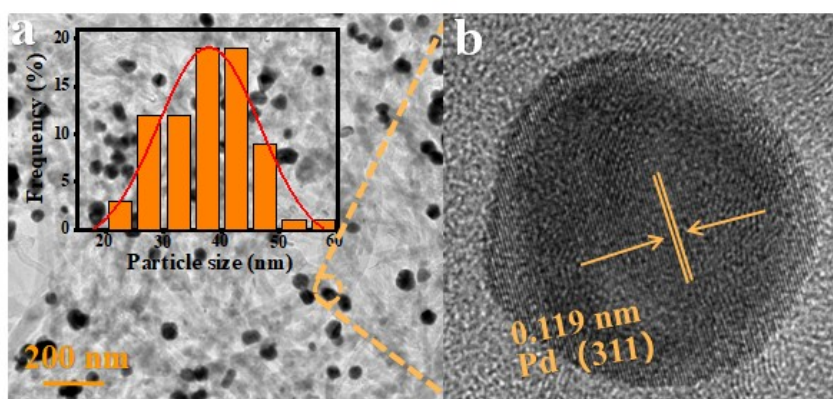

**Fig. S1** (a) TEM and (b) HRTEM image of Pd/CNTs catalysts.

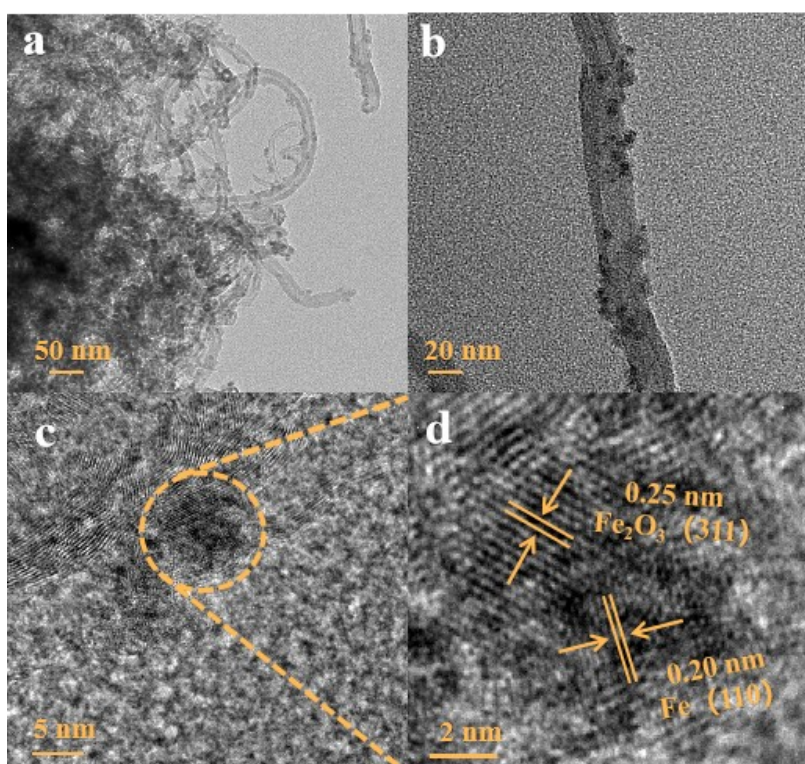

**Fig. S2** TEM (a, b) and HRTEM (c, d) images of Fe/CNTs catalysts.

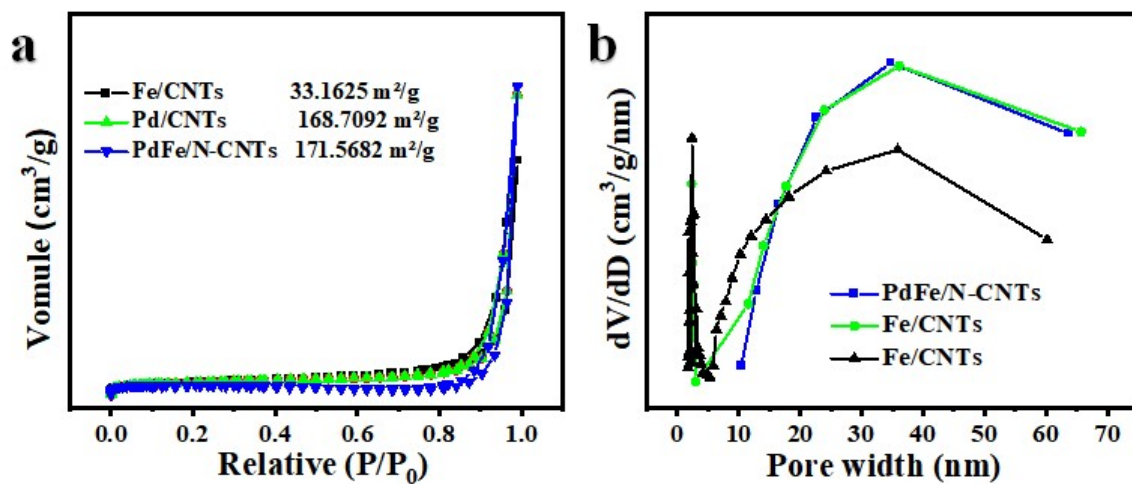

**Fig. S3** (a) Nitrogen adsorption-desorption isotherms and (b) pore size distribution of the samples.

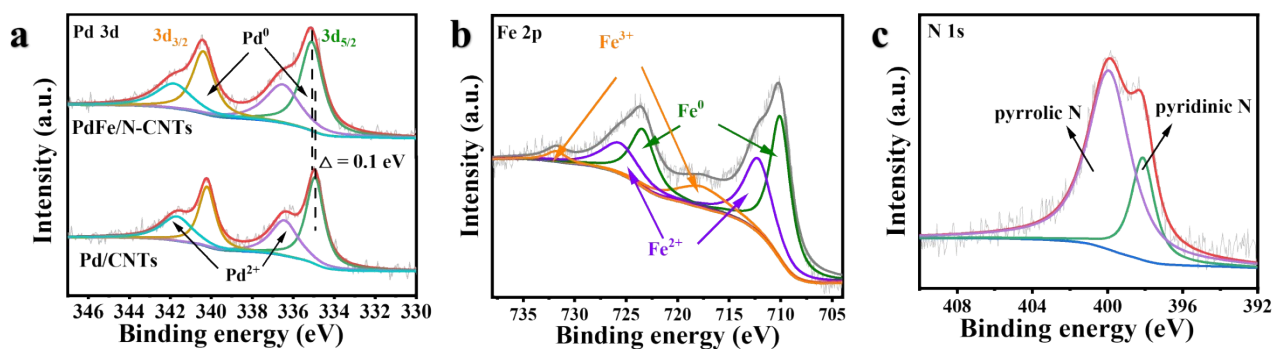

**Fig. S4** The high-resolution XPS spectra: (a) Pd 3d in PdFe/N-CNTs and Pd/CNTs; (b) N 1s in PdFe/N-CNTs; (c) Fe 2P in Fe/CNTs.

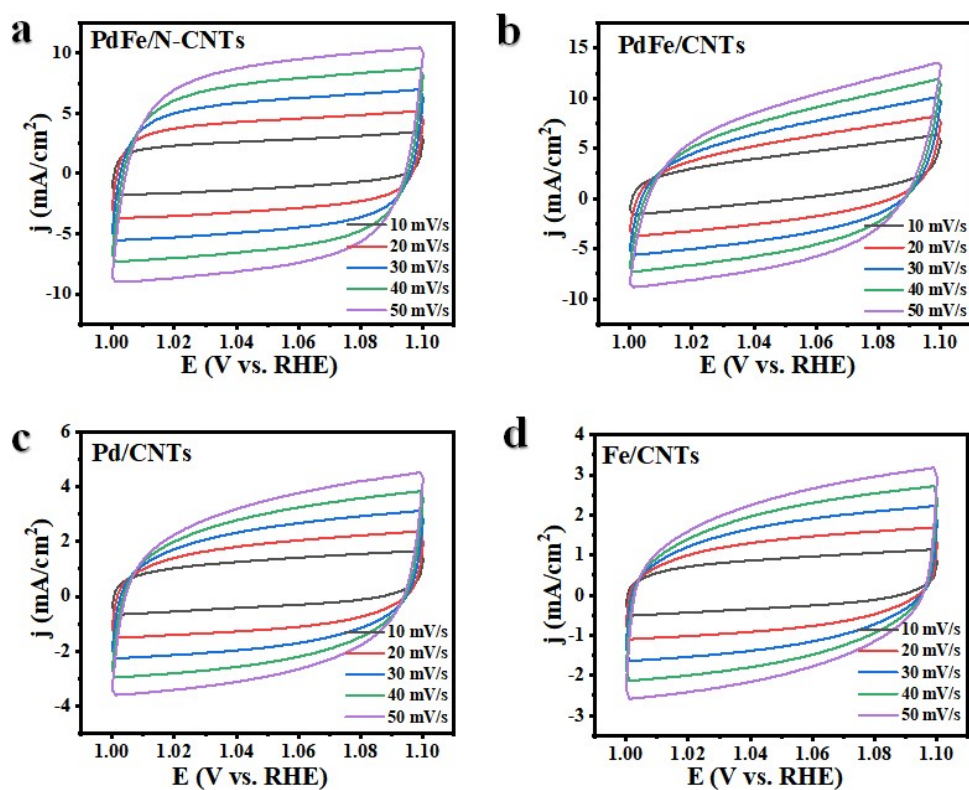

**Fig. S5** CV curve of various electrodes recorded at different scan rates of 10, 20, 30, 40, and 50 mVs<sup>-1</sup> for (a) PdFe/N-CNTs, (b) PdFe/CNTs, (c) Pd/CNTs and (d) Fe/CNTs.

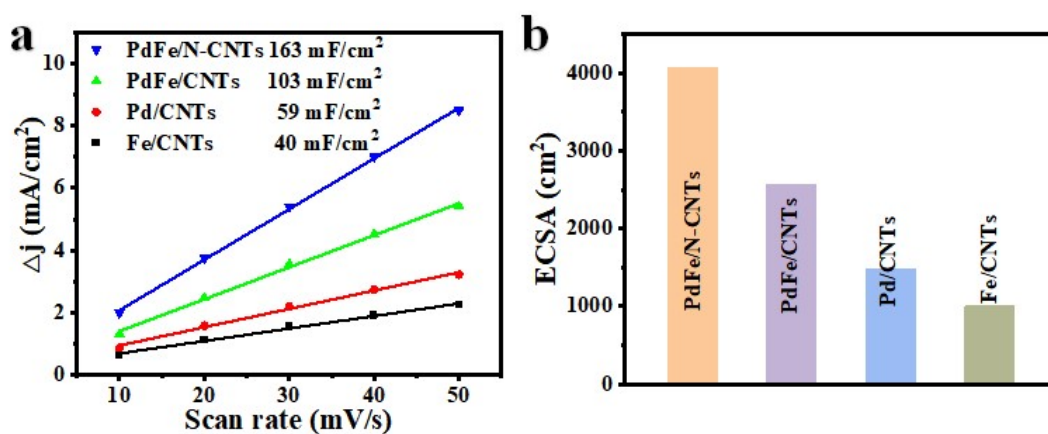

**Fig. S6** The double layer capacity  $C_{dl}$  and ECSA of PdFe/N-CNTs, PdFe/CNTs, Pd/CNTs and Fe/CNTs.

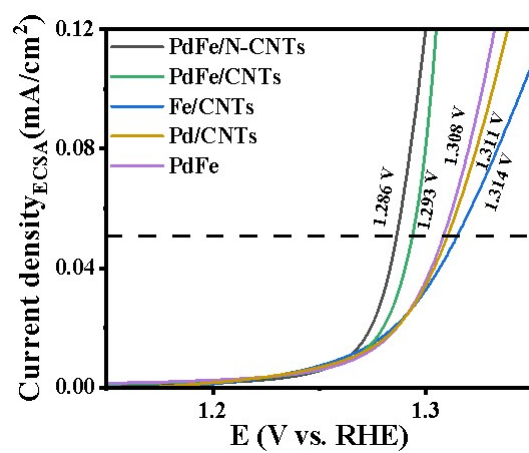

**Fig. S7** The normalized EGOR LSV curves based on ECSA.

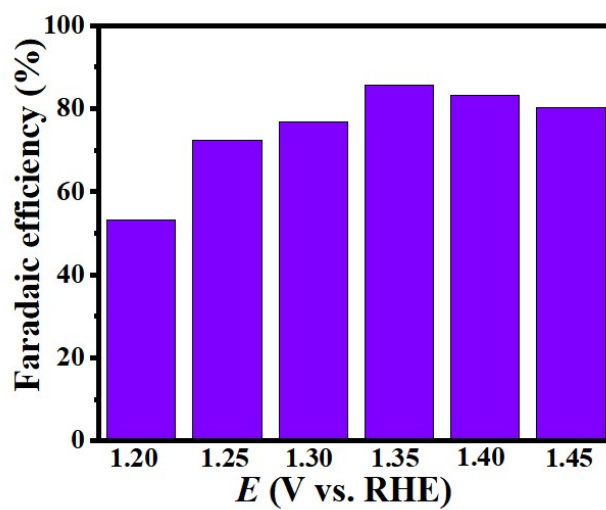

**Fig. S8** Faradaic efficiencies for formate production at various potentials.



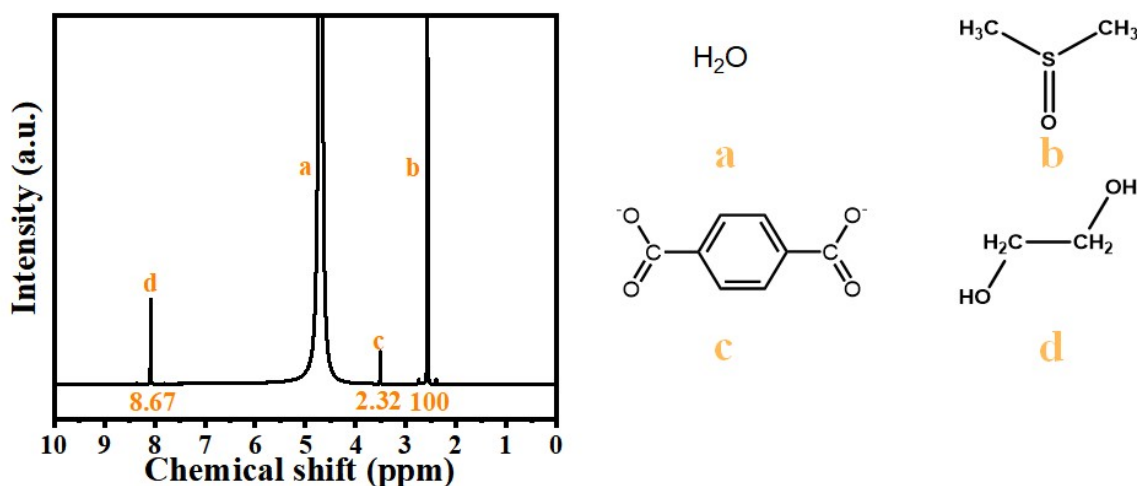

$$m_{EG} = \frac{I_{EG} \times N_{DMSO} \times M_{EG}}{I_{DMSO} \times N_{EG} \times M_{DMSO}} \times m_{DMSO} \times n = \frac{2.32 \times 6 \times 62.068}{100 \times 4 \times 78.12} \times 33 \times 20 = 18.25 \text{ mg}$$

$$m_{formate} = \frac{I_{formate} \times N_{DMSO} \times M_{formate}}{I_{DMSO} \times N_{formate} \times M_{DMSO}} \times m_{DMSO} \times n = \frac{8.67 \times 6 \times 46.03}{100 \times 1 \times 78.12} \times 33 \times 20 = 202.3 \text{ mg}$$

$$\text{Selectivity}_{formate} = \frac{N_{formate} = \frac{m_{formate}}{M_{formate}}}{2N_{Consumed EG} = \frac{m_{EG}}{M_{EG}}} \times 100\% = \frac{\frac{202.3}{46.03}}{2 \times \frac{183.7 - 18.25}{62.068}} = 82.44\%$$

$$FE_{formate} = \frac{n \times N_{formate} \times F}{\text{Total passed charge (C)}} \times 100\% = \frac{3 \times 0.0044 \times 96485}{1463.23} = 87.04\%$$

Fig. S9  $^1\text{H}$  NMR spectra after EGOR on PdFe/N-CNTs at 1.35 V.

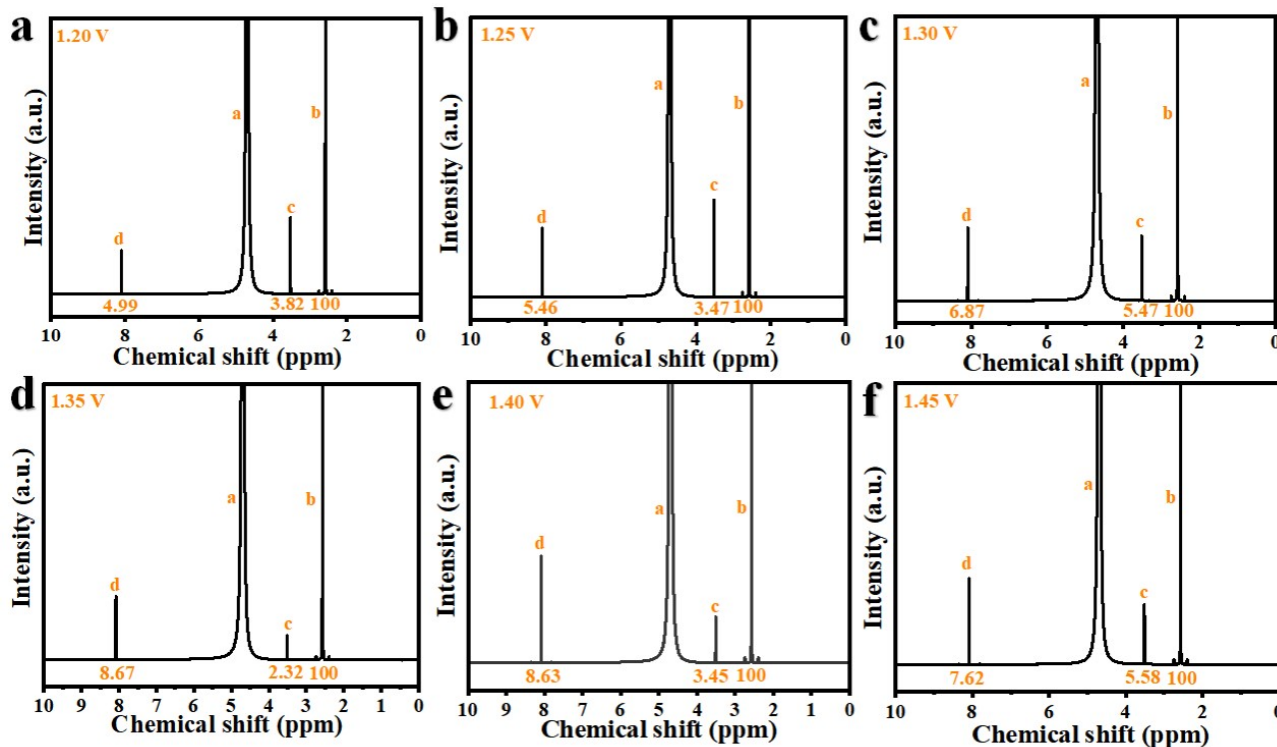

Fig. S10  $^1\text{H}$  NMR spectra after EGOR on PdFe/N-CNTs in 1.20–1.45 V.

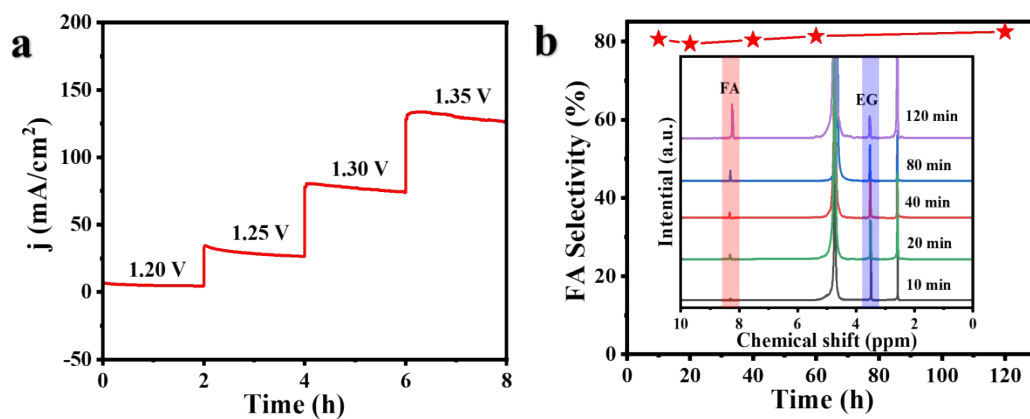

**Fig. S11** (a) Stability test of PdFe/N-CNTs electrode toward EGOR at different potentials; (b) FA selectivity as a function of time.

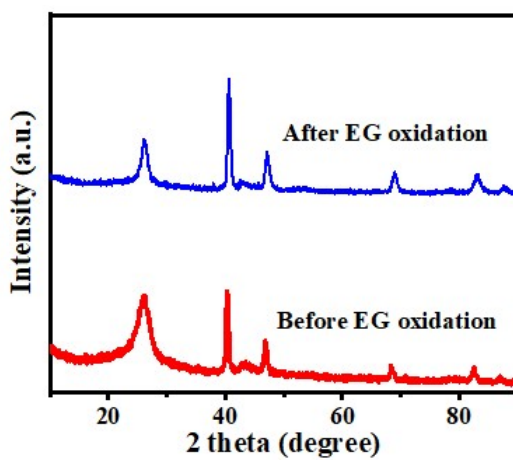

**Fig. S12** XRD pattern of PdFe/N-CNTs before and after EG oxidation.

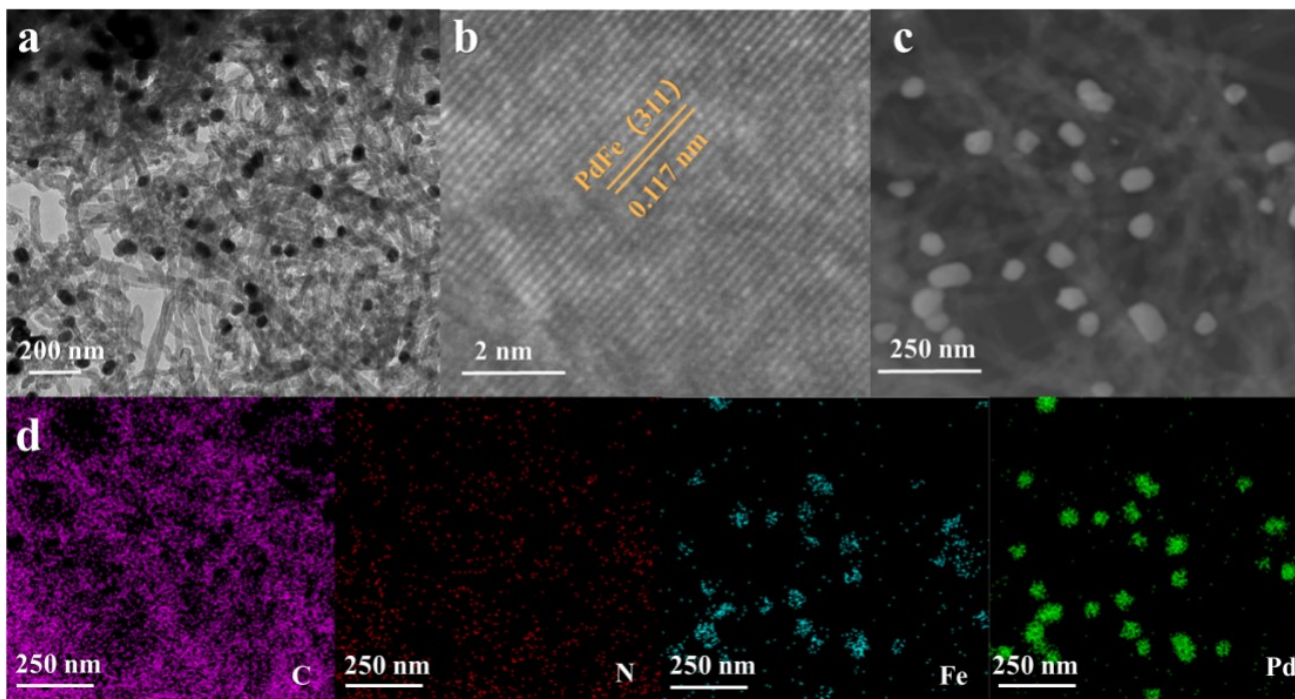

**Fig. S13** PdFe/N-CNTs images after EGOR: (a) TEM, (b) HRTEM, (c) HAADF-STEM, and (d) the corresponding elemental mappings of Pd, Fe, N, C.

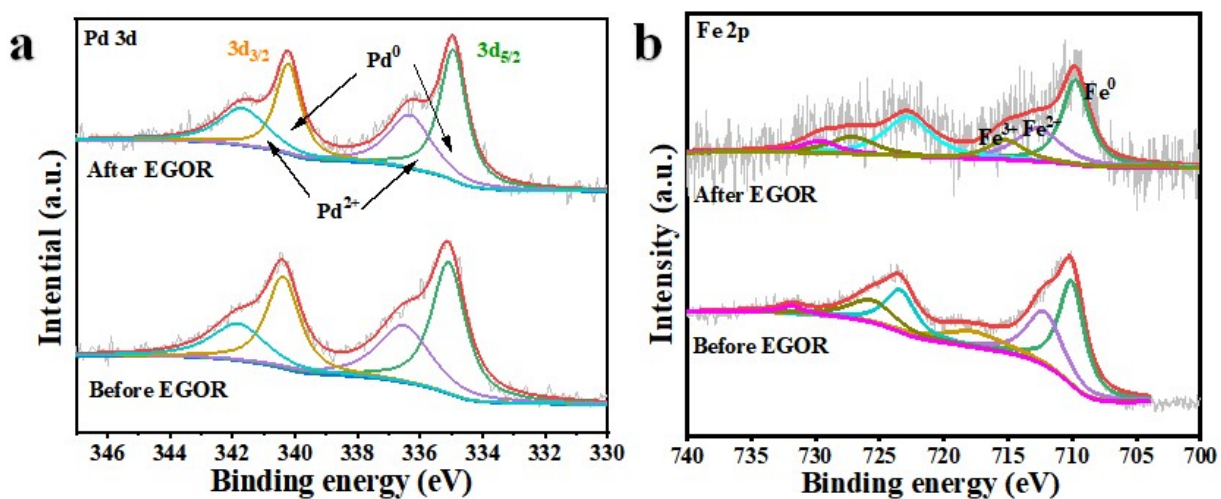

**Fig. S14** XPS spectra of PdFe/N-CNTs after EGOR test: (a) Pd 3d; (b) Fe 2P.



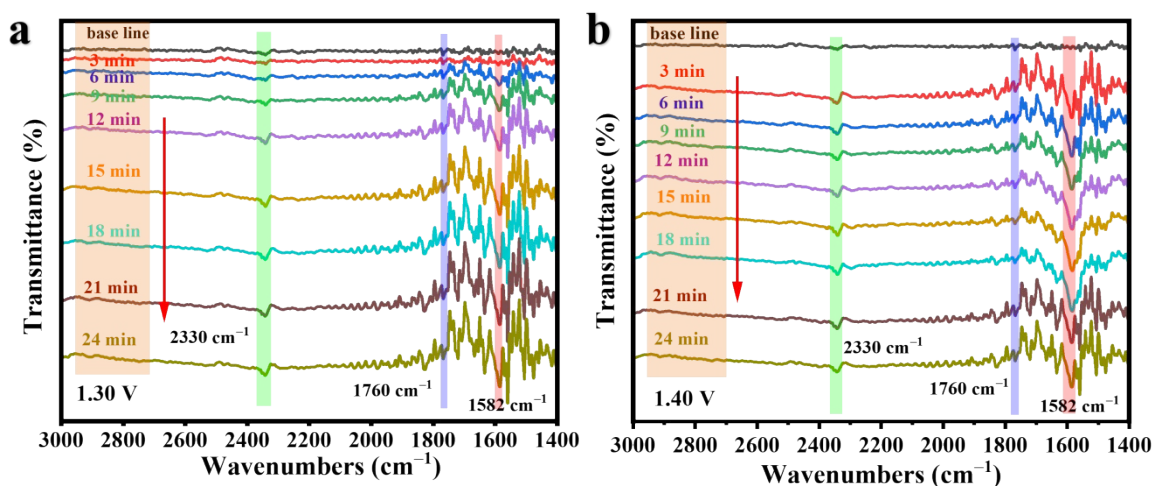

**Fig. S15** Time-dependent *In-situ* FTIR of PdFe/N-CNTs at varying potentials in 1 M KOH + 0.3 M EG: (a) 1.30 V and (b) 1.40 V.

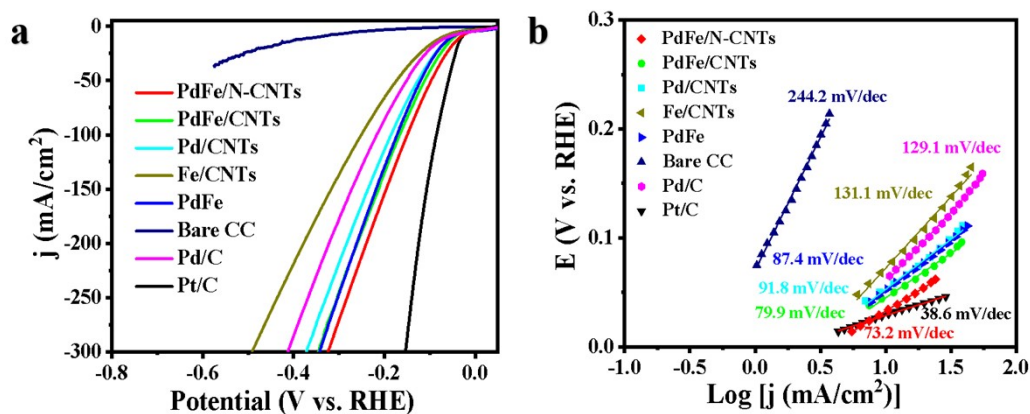

**Fig. S16** (a) HER polarization curves of PdFe/N-CNTs, PdFe/CNTs, Pd/CNTs and Fe/CNTs catalysts, and (b) the corresponding Tafel plots.

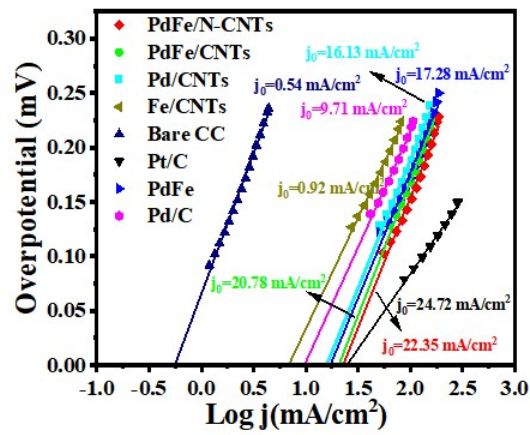

**Fig. S17** The exchange current densities of Bare CC, Fe/CNTs, Pd/C, Pd/CNTs, PdFe, PdFe/CNTs, PdFe/N-CNTs and Pt/C.

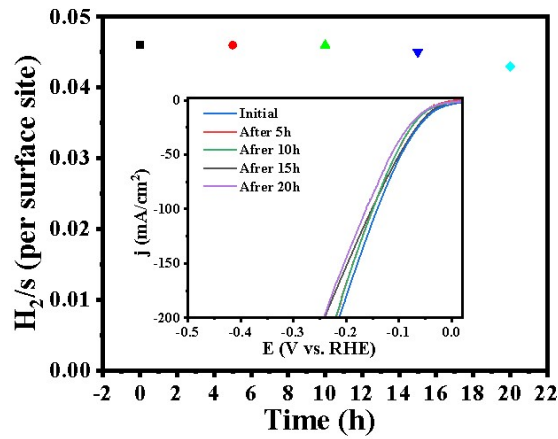

**Fig. S18** The TOF values of PdFe/N-CNTs catalyst with time (the inset: LSV curve over time).

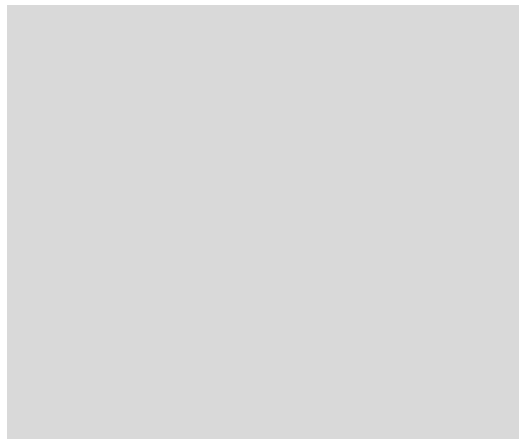

**Fig. S19** EIS spectra of Fe/CNTs, Pd/C, Pd/CNTs, PdFe, PdFe/CNTs and PdFe/N-CNTs.

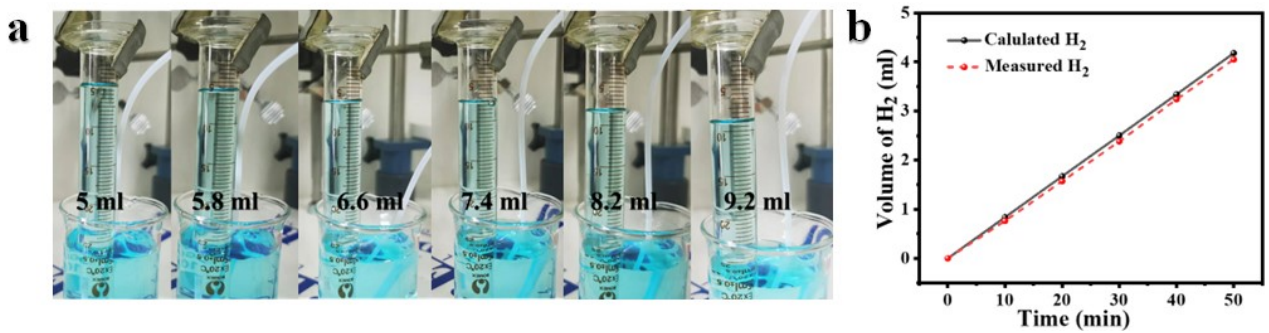

**Fig. S20** (a) Amount of H<sub>2</sub> generation for PdFe/N-CNTs in 1M KOH at time interval of 10 min; (b) Calculated and measured amount of H<sub>2</sub> as a function of time.

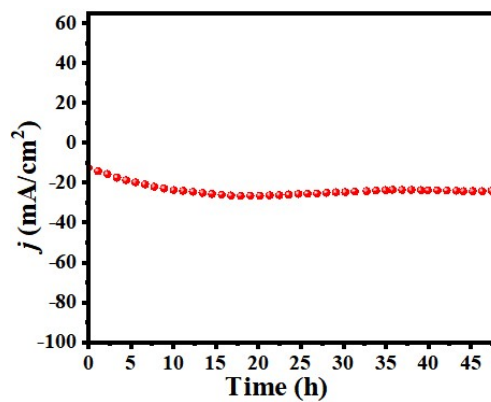

**Fig. S21** Chronopotentiometry curve of PdFe/N-CNTs during HER process.

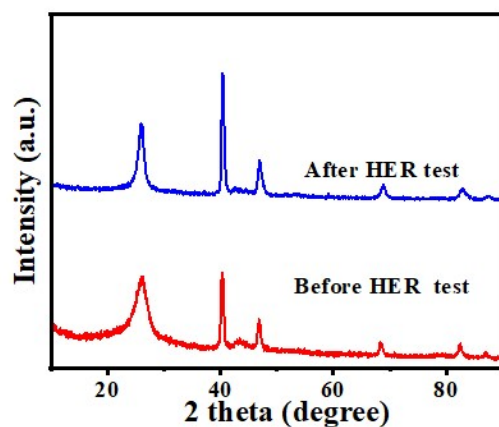

**Fig. S22** XRD pattern of PdFe/N-CNTs after HER durability test.

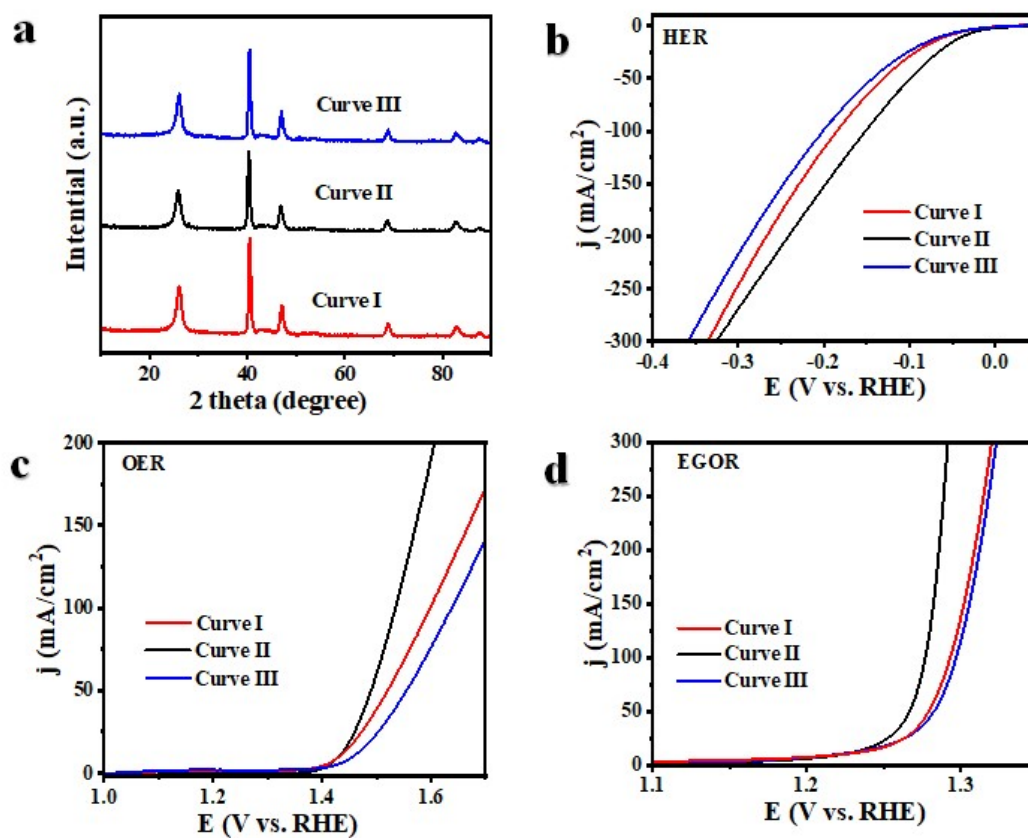

**Fig. S23** XRD patterns, b) HER, c) OER, and d) EGOR polarization curves of various PdFe/N-CNTs catalysts with different Pd/Fe ratios (Curve I: Pd/Fe=1:1; Curve II: Pd/Fe=1:2; Curve III: Pd/Fe=1:3).

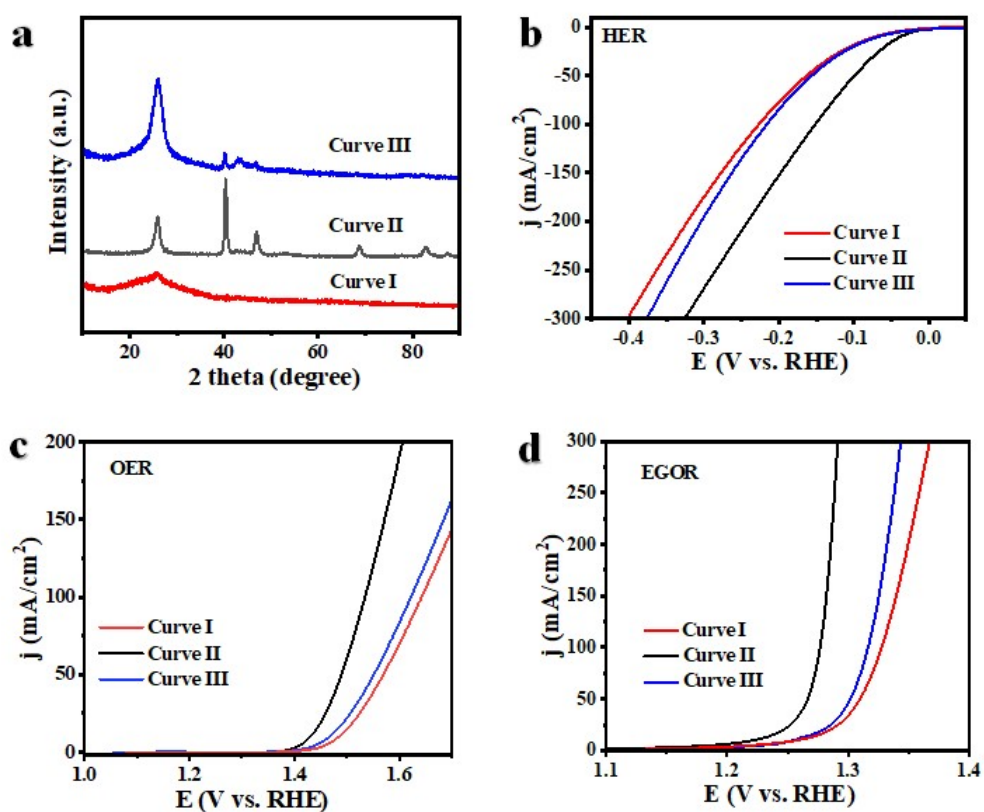

**Fig. S24** (a) XRD patterns, (b) HER, (c) OER, and (d) EGOR polarization curves of various PdFe/N-CNTs catalysts under different pyrolysis temperature (Curve I: 300 °C; Curve II: 500 °C; Curve III: 700 °C).

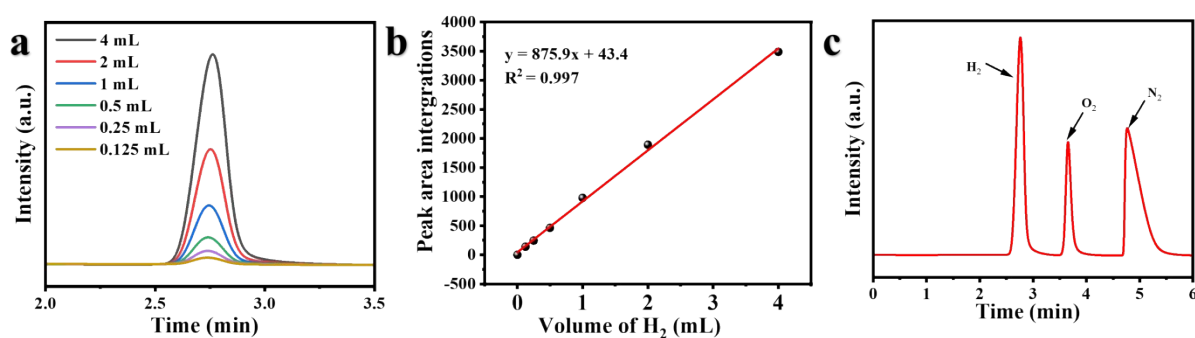

**Fig. S25** (a) Gas chromatography spectra of the various H<sub>2</sub> volume; (b) The calibration curve used for calculation of H<sub>2</sub> volume; (c) Gas chromatography spectra of H<sub>2</sub> volume at 1.45 V.

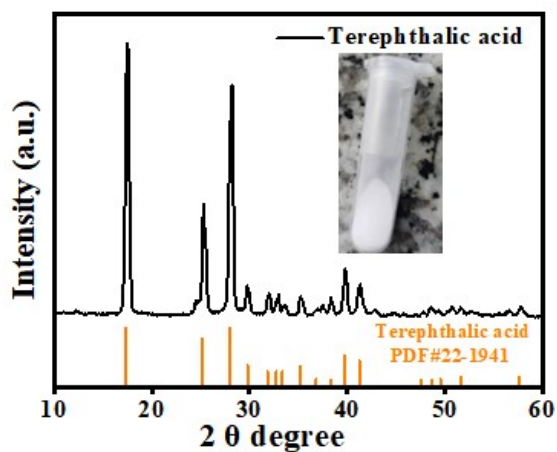

**Fig. S26** XRD pattern of the recovered TPA (inset: digital photograph of the recovered TPA powder).

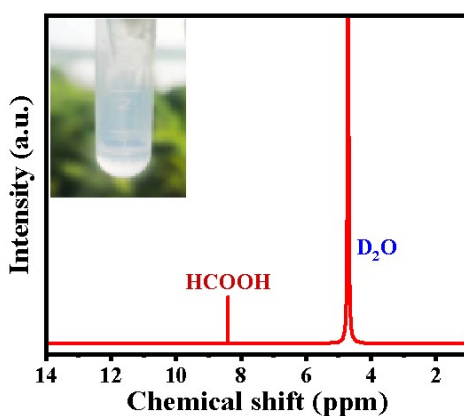

**Fig. S27**  $^1\text{H}$  NMR spectrum of formic acid (inset: digital photograph of formic acid).

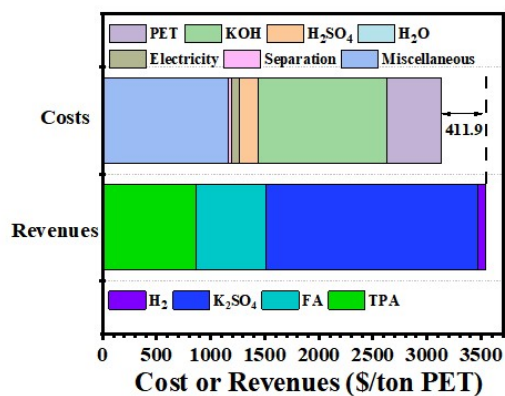

**Fig. S28** Technoeconomic analysis of this electro-reforming process. Assuming 100% of PTA and

100% of  $K_2SO_4$  are recycled.

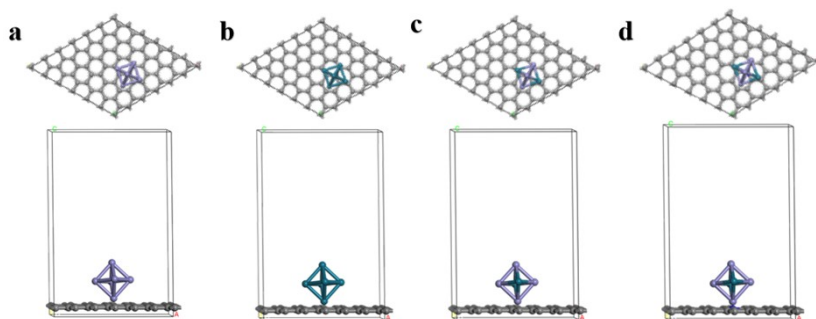

**Fig. S29** Theoretical modes of (a) Fe/CNTs, (b) Pd/CNTs (c) PdFe/CNTs and (d) PdFe/N-CNTs.

**Table S1** A summary of the performance on a 10,100-mA/cm<sup>2</sup> scale for the electrocatalytic oxidation of EG in alkaline electrolytes in available literature.

| Catalysts                                                     | Electrolyte              | Potential <sub>OER</sub><br>j <sub>10,100</sub> (V vs.<br>RHE) | Potential <sub>EGOR</sub><br>j <sub>10,100</sub> (V vs.<br>RHE) | Potential <sub>OER-EGOR</sub><br>j <sub>100</sub> (V vs.<br>RHE) | FE(%)     | Ref.                                             |
|---------------------------------------------------------------|--------------------------|----------------------------------------------------------------|-----------------------------------------------------------------|------------------------------------------------------------------|-----------|--------------------------------------------------|
| <b>PdFe/N-CNTs</b>                                            | <b>1 M KOH +0.3 M EG</b> | <b>1.43, 1.54</b>                                              | <b>1.22, 1.28</b>                                               | <b>260</b>                                                       | <b>87</b> | <b>This work</b>                                 |
| CuCo <sub>2</sub> O <sub>4</sub> /NF                          | 1 M KOH + 0.06 M EG      | 1.57, 1.72                                                     | 1.23, 1.47                                                      | 250                                                              | 86        | Green Chem., 24 (2022) 6571-6577.                |
| NiO@C/CC                                                      | 1 M KOH + 1 M EG         | j <sub>50</sub> =1.96, 2.06                                    | J <sub>50</sub> = 1.66, 1.82                                    | 240                                                              | –         | Adv. Energy Mater. 10 (2020) 2001397.            |
| OMS-Ni <sub>1</sub> -CoP                                      | 1 M KOH + 0.5 M EG       | 1.45, 1.60                                                     | 1.30, 1.42                                                      | 180                                                              | 93.2      | Appl. Catal. B: Environ. 316 (2022) 316, 121667. |
| Co-Ni <sub>2</sub> P/NF                                       | 1 M NaOH + 2 g/L PET     | /1.52                                                          | 1.24, 1.37                                                      | 150                                                              | 85        | Sustain. Energ. Fuels, 6 (2022) 4916-4924.       |
| Bi <sub>0.13</sub> Co <sub>2.83</sub> O <sub>4-550</sub>      | 1 M KOH + 1 M EG         | 1.63, 1.72                                                     | 1.34, 1.42                                                      | 300                                                              | -         | Sustain. Energ. Fuels, 6 (2022) 4916-4924.       |
| Ni <sub>3</sub> N-Ni <sub>0.2</sub> M <sub>0.8</sub> NN Ws/CC | 1 M KOH + 0.3 M EG       | 1.51, 1.65                                                     | 1.32, 1.43                                                      | 220                                                              | -         | J. Energy Chem. 72 (2022) 432-441.               |
| NiCo <sub>2</sub> O <sub>4</sub> /CFP                         | 1 M NaOH + 0.06 M EG     | 1.55, /                                                        | 1.31, 1.47                                                      | /                                                                | 85        | ACS Catal. 12 (2022) 6722-6728.                  |



**Table S2** HER comparison in 1.0 KOH with the recently reported literatures.

| Materials                            | Tafel slope (mV dec <sup>-1</sup> ) | $\eta_{10}$ / mV | Reference                                                    |
|--------------------------------------|-------------------------------------|------------------|--------------------------------------------------------------|
| <b>PdFe/N-CNTs</b>                   | <b>70.4</b>                         | <b>32</b>        | <b>This work</b>                                             |
| Pd ND/DR-MoS <sub>2</sub>            | 41                                  | 40               | <i>J. Mater. Chem. A</i> 4 (2016) 4025-4031.                 |
| Pd/MOFDC                             | 78                                  | 35               | <i>RSC Adv.</i> 10 (29) (2020) 17359-17368.                  |
| Pd/NiFeO <sub>x</sub>                | 78                                  | 76               | <i>Adv. Funct. Mater.</i> 31 (51) (2021) 2107181.            |
| Pd-e-NiCo-PBA-C                      | 67                                  | 147              | <i>Adv. Funct. Mater.</i> 31 (10) (2020) 2008989.            |
| RMoS <sub>2</sub> -Pd                | 35.9                                | 86               | <i>ACS Appl. Mater. Interfaces</i> 11(45) (2019) 42094       |
| Pd/Mo <sub>3</sub> N <sub>2</sub>    | 88                                  | 65               | <i>Phy. Chem. Chem. Phy.</i> 224 (2) (2022) 771-777.         |
| Pd/G/ZnO/NF                          | 46.5                                | 31               | <i>RSC Adv.</i> 9 (58) (2019) 33814-33822                    |
| PdCuRu <sub>7,6</sub>                | 52                                  | 31               | <i>J. Mater. Chem. A</i> 7 (35) (2019) 20151-20157.          |
| Pd <sub>86</sub> B <sub>14</sub> /C  | 36.6                                | 38               | <i>Chem. Eng. J.</i> 433 (2022) 133525.                      |
| Pd NN                                | –                                   | 110              | <i>ACS Appl Mater Interfaces</i> 9 (45) (2017) 39303-39311.  |
| RhPd-H-NS/C                          | 35.7                                | 40               | <i>J. Am. Chem. Soc.</i> 142 (7) (2020) 3645-3651.           |
| PdCu NSs                             | 124                                 | 106              | <i>Small</i> 13 (12) (2017) 1602970.                         |
| Ni@Ni(OH) <sub>2</sub> /Pd/rGO       | 70                                  | 76               | <i>J. Power Sources</i> 352 (2017) 26-33.                    |
| Pd–Pt-S                              | 31                                  | 71               | <i>ACS Appl Mater Interfaces</i> 9 (21) (2017) 18008-18014.  |
| NiCo <sub>2</sub> S <sub>4</sub> /Pd | 70                                  | 83               | <i>ACS Appl Mater Interfaces</i> 10 (26) (2018) 22248-22256. |
| PdRuTeNRs                            | 61.6                                | 37               | <i>Nanoscale</i> 14 (40) (2022) 14913-14920.                 |
| PdPtCuNiP                            | –                                   | 32               | <i>Adv. Funct. Mater.</i> 31 (38) (2021) 2101586.            |

**Table S3** Performance comparison of hybrid electrolysis coupled with EG oxidation reactions in recent reports and this work.

| Anode                                                                                      | Electrolyte                                                                | Cathode                   | techno-economic analysis | Cell voltage (V)                                         | Reference                             |
|--------------------------------------------------------------------------------------------|----------------------------------------------------------------------------|---------------------------|--------------------------|----------------------------------------------------------|---------------------------------------|
| PdFe/N-CNTs                                                                                | PET hydrolysate                                                            | PdFe/N-CNTs               | 411.9                    | 1.54@100mA/cm <sup>2</sup><br>1.68@500mA/cm <sup>2</sup> | <b>This work</b>                      |
| CuCo <sub>2</sub> O <sub>4</sub> /NF                                                       | PET hydrolysate                                                            | Pt/NF                     | 614                      | 1.56V@100mA/cm <sup>2</sup>                              | Green Chem. 24 (2022) 6571-6577.      |
| Mn <sub>0.1</sub> Ni <sub>0.9</sub> Co <sub>2</sub> O <sub>4</sub> . <sub>8</sub> RSFs/CFP | PET hydrolysate                                                            | Pt sheet                  | 226                      | 1.42V@50mA/cm <sup>2</sup>                               | J. Hazar. Mater. (2023) 131743.       |
| NiCo <sub>2</sub> O <sub>4</sub> /CFP                                                      | PET hydrolysate                                                            | SnO <sub>2</sub> /CC      | 557                      | 1.90V@20mA/cm <sup>2</sup>                               | ACS Catal. 12 (2022) 6722-6728.       |
| Co-Ni <sub>2</sub> P/NF                                                                    | PET hydrolysate                                                            | Co-Ni <sub>2</sub> P/NF   | -                        | 1.43V@10mA/cm <sup>2</sup>                               | Sustain. Energy Fuels. 6 (2022) 4916. |
| CoNi <sub>0.25</sub> P/NF                                                                  | PET hydrolysate                                                            | CoNi <sub>0.25</sub> P/NF | 350                      | 1.80V@500mA/cm <sup>2</sup>                              | Nat. Commun. 12 (2021) 4679.          |
| Co <sub>2</sub> Cl-NiS                                                                     | PET hydrolysate electrolysis and conventional water electrolysis (2 M KOH) | Co <sub>2</sub> Cl-NiS    | -                        | 1.51@100mA/cm <sup>2</sup><br>1.55@200mA/cm <sup>2</sup> | Nano-Micr. Lett. 15 (1) (2023) 210.   |

Note: j: current density; -: no relevant values are given in the articles.
